# Supplementary material
Source: PubMed Central journal article supplement (PMC11562167)
Supplement: media-5.pdf [file media-5.pdf]

**Supplemental Table 1. sgRNA sequences used in this study.**

| <b>Target</b>      | <b>Use</b>                | <b>Sequence</b>          | <b>Strand</b> |
|--------------------|---------------------------|--------------------------|---------------|
| TgLaforin 3'UTR    | TgLaforin epitope tag     | GCTTAGCGTGTGAACA<br>GCAG | +             |
| TgLaforin (exon 1) | TgLaforin KO              | GAAGTCCCGATAACCTA<br>CGC | +             |
| Chromosome VI      | TgLaforin complementation | GCCGTTCTGTCTCACG<br>ATGC | +             |
