# Supplementary material
Source: PubMed Central journal article supplement (PMC11562167)
Supplement: media-6.pdf [file media-6.pdf]

**Supplemental Table 2. Plasmids used in this study.**

| <b>Name</b>            | <b>Use</b>                                          | <b>Source</b>                       |
|------------------------|-----------------------------------------------------|-------------------------------------|
| pSAG1::CAS9-U6::sgUPRT | Genetic modifications in <i>T. gondii</i>           | David Sibley, Washington University |
| pJET-NcGra7_DHFR       | TgLaforin knockout via DHFR-TS* knock in            | Peter Bradley, UCLA                 |
| pHA3x-LIC              | Tagging and complementation of TgLaforin            | Peter Bradley, UCLA                 |
| TgLaforin-HA3x-LIC     | Tagging and complementation, derived from pHA3x-LIC | GenScript                           |
