# Supplementary material
Source: PubMed Central journal article supplement (PMC11562167)
Supplement: media-7.pdf [file media-7.pdf]

### Supplemental Table 3. Primers used in this study.

Primers are presented in uppercase where the primer binds directly to the template, and in lowercase-bold where new sequence is being introduced. F, forward sequence; R, reverse sequence.

| Name                            | Use                                                                                        | Sequence (5' to 3')                                                        |
|---------------------------------|--------------------------------------------------------------------------------------------|----------------------------------------------------------------------------|
| TgLaf_3'UTR_sgRNA_F             | sgRNA mutagenesis for TgLaf-HA epitope tagging                                             | <b>tgaacagcag</b> GTTTTAGAGCTAGAAATA GC                                    |
| TgLaf_3'UTR_sgRNA_R             |                                                                                            | <b>cacgctaagc</b> AACTTGACATCCCCATTTA C                                    |
| TgLaf_exon5_homology_F          | Generation of TgLaf-HA tagging construct                                                   | AGAGGAGGCGGAGGAGAG                                                         |
| TgLaf_3'UTR_HX+homology_R       |                                                                                            | TCCGTATCGCCCCCTCTCGTCTGACA CGCCCTCTTTCTCCAGCACGAAACC TTGCATTC              |
| TgLaforin_sgRNA_E1_F            | sgRNA for TgLaf-KO                                                                         | <b>taacctacgc</b> GTTTTAGAGCTAGAAATAG C                                    |
| TgLaforin_sgRNA_E1_R            |                                                                                            | <b>tcgggacttc</b> AACTTGACATCCCCATTTA C                                    |
| NcGra7-DHFR*_Fwd-TgLaf_homology | Amplification of NcGra7-DHFR* flanked with 40-nt TgLaforin                                 | <b>gtctcttttctgcgctctccctgctcgtagaa</b><br><b>gg</b> CCACTCCATGGAACCTGACTG |
| NcGra7-DHFR*_Rev-TgLaf_homology |                                                                                            | <b>gctctttccccattttctttctctcaggggtccg</b><br>CCTGCAAGTGCATAGAAGGAA         |
| TgME49_ChromVI_sgRNA_F          | sgRNA for ChromVI used in TgLaf complementation                                            | <b>ctcacgatgc</b> GTTTTAGAGCTAGAAATAG C                                    |
| TgME49_ChromVI_sgRNA_R          |                                                                                            | <b>acagaacggc</b> AACTTGACATCCCCATTT AC                                    |
| TgLAF_WT_F                      | "PCR1": Figure 3A. Amplifies WT TgLaforin                                                  | TCCTACATTCTGGAGCGAAG                                                       |
| TgLAF_WT_R                      |                                                                                            | AAAGCCACTTTCTCCAGGAG                                                       |
| DHFR*_R                         | "PCR2": Figure 3A. Amplifies $\Delta$ TgLaf chimeric locus in conjunction with TgLAF_WT_F. | GCATTATGAGGAAAGCCCAC                                                       |
| TgChromVI_WT_F                  | Amplification of WT Chrom VI locus: ("VI": Figure                                          | CAGGAAATATGCTGCGAGGA                                                       |
| TgChromVI_WT_R                  |                                                                                            | TGTGTCTGCTCTTGAAGGTG                                                       |
| TgLaf_COMP_F                    | Binds to HXGPRT cassette within complementation construct (derived from pHA3x_LICs         | TGCAAGCCCTACATTGACAA                                                       |
